# Supplementary material
Source: Springer Nature journal article supplement (https://www.springermedizin.de/resource/supplementary/12950_2010_186_MOESM10_ESM.pdf/9558252)

■ 6 week / HFC  
 ■ 6 week / DIO  
 ▨ 16 week / HFC  
 ▨ 16 week / DIO  
 ▨ 26 week / Chow  
 ▨ 26 week / HFC

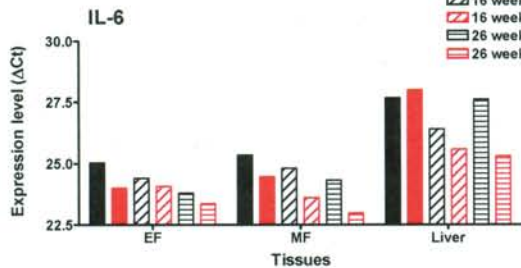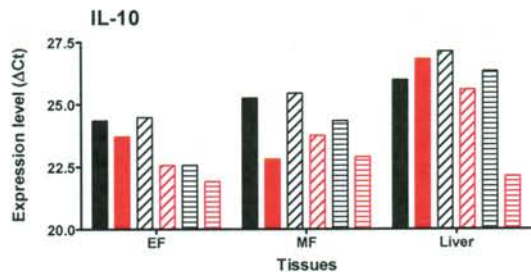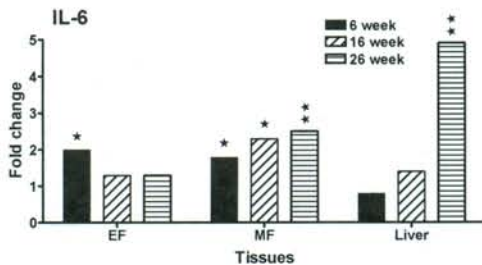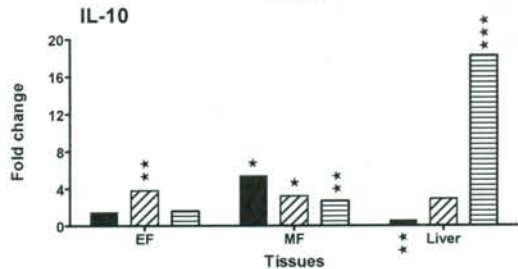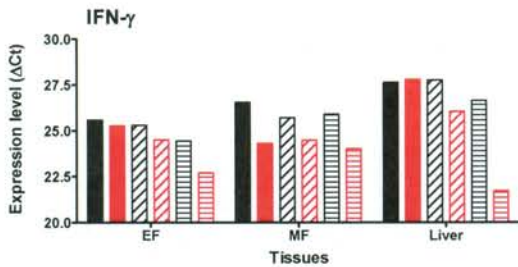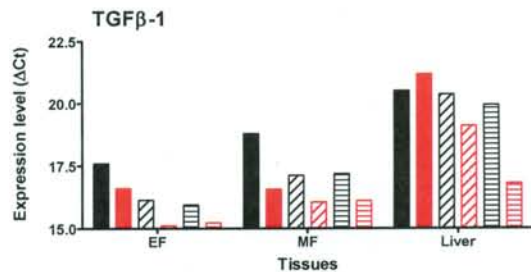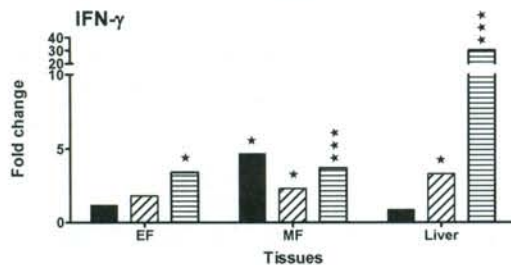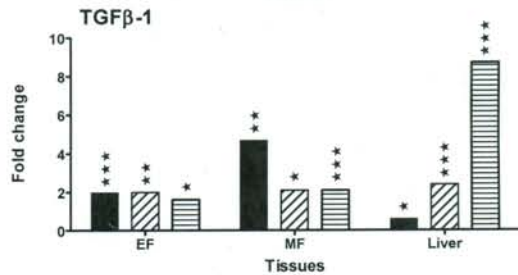

Supplement: MOESM10 [file 9558252]
